# Supplementary material for: Evaluating 5% Healthier: An e-Service-Learning Teleexercise Program for Undergraduate and Graduate Students in Exercise Physiology
Source: Hindawi journal article supplement (doi:10.1155/2022/2889945), 2022-04-19
Supplement: f1 [file 2889945.f1.zip]

Archive with 3 entries (3 files):
- Appendix 1 Participant Post Survey.docx
- Appendix 2 UG post survey.docx
- Appendix 3 Grad Post Survey.docx
