# Supplementary material for: Evaluating 5% Healthier: An e-Service-Learning Teleexercise Program for Undergraduate and Graduate Students in Exercise Physiology
Source: Hindawi journal article supplement (doi:10.1155/2022/2889945), 2022-04-19
Supplement: f1 [file 2889945.f1.zip › Appendix 1 Participant Post Survey.docx]

5% Healthier Participant Post Survey

Thank you for your participation in 5% Healthier. This quick, anonymous survey is intended to capture the impact of 5% Healthier. We will share the collective results with our stakeholders and use your feedback to improve 5% Healthier for future cohorts. We appreciate you taking the time to respond.

1. How many weeks of the 10 week training program did you complete?

Options: 1-10

1. How often were you exercising BEFORE you started 5% Healthier?

Options: Daily, 4-6 times a week, 2-3 times a week, once a week, never

1. How often did you exercise while participating in 5% Healthier?

Options: Daily, 4-6 times a week, 2-3 times a week, once a week, never

1. How would you rate your experience with your student trainer?

Options: Excellent (1), good (2), average (3), poor (4), terrible (5)

1. How would you rate the quality of the exercise programming you received?

Options: Excellent (1), good (2), average (3), poor (4), terrible (5)

1. How would you rate the educational component of the program (weekly emails)?

Options: Excellent (1), good (2), average (3), poor (4), terrible (5)

1. The 5% Healthier Program helped me gain fitness

Options: Strongly agree (1), somewhat agree (2), neither agree nor disagree (3), somewhat disagree (4), strongly disagree (5)

1. The 5% Healthier Program helped me improve mental health

Options: Strongly agree (1), somewhat agree (2), neither agree nor disagree (3), somewhat disagree (4), strongly disagree (5)

1. The 5% Healthier Program helped me relieve stress

Options: Strongly agree (1), somewhat agree (2), neither agree nor disagree (3), somewhat disagree (4), strongly disagree (5)

1. The 5% Healthier Program helped me develop the habit of exercising

Options: Strongly agree (1), somewhat agree (2), neither agree nor disagree (3), somewhat disagree (4), strongly disagree (5)

1. The 5% Healthier Program helped me improve my ability to complete daily activities

Options: Strongly agree (1), somewhat agree (2), neither agree nor disagree (3), somewhat disagree (4), strongly disagree (5)

1. Would you recommend this program to others?

Options: yes (1), no (2)

1. Do you have any concerns/comments regarding your experience in this program?

Open ended text entry

1. Do you have any suggestions for future semesters?

Open ended text entry

Thank you for your participation in 5% Healthier. We are very grateful for your commitment to this program and working with our students. We hope you will join us again in the Fall 2021 semester!
