# Supplementary material for: Evaluating 5% Healthier: An e-Service-Learning Teleexercise Program for Undergraduate and Graduate Students in Exercise Physiology
Source: Hindawi journal article supplement (doi:10.1155/2022/2889945), 2022-04-19
Supplement: f1 [file 2889945.f1.zip › Appendix 2 UG post survey.docx]

Professional Field Placement Post Semester Survey

This anonymous survey is intended to capture your experience in Professional Field Placement. It will not impact whether or not you pass this course. The information collected will be used to improve the course and student experiences. Some findings will be compiled to be shared with stakeholders, but all information will be aggregated and your individual responses will not be shared. Thank you for completing this survey.

Do you feel you’ve met these course learning objectives?

Options: definitely yes (1), probably yes (2), might or might not (3), probably not (4), definitely not (5)

1. Take part in practical experiences within the Exercise Physiology environment
2. Gain a more complete understanding of various Exercise Physiology functions.
3. Develop the ability to analyze and propose solutions to problems that you may encounter as an Exercise Physiologist
4. Develop a greater understanding about career options while more clearly defining personal career goals
5. Improve your level of responsibility and professionalism pertaining to both course work and industry
6. Develop and refine oral and written communication skills with potential employers, coworkers, and instructors
7. Translate scientific information to a lay audience

Compared with when you started your internship, how much have you improved in the following areas?

Options: a great deal (1), a lot (2), a moderate amount (3), a little (4), same as before (5)

1. Interact professionally with clients/patients
2. Develop exercise programming and prescription
3. Provide important and meaningful service to others
4. Assuming responsibility
5. Taking the initiative
6. Self-confidence
7. Accepting constructive criticism
8. Leadership abilities
9. Quality of work produced
10. Ability to convey topics effectively
11. Timeliness of communication
12. Appropriateness & courtesy of communication
13. Verbal communication with clients/patients
14. Verbal communication with supervisors
15. Written communication with clients/patients
16. Written communication with supervisors
17. Tech based communication
18. Communication within a group or team

Do you think your internship prepared you to:

Options: definitely yes (1), probably yes (2), might or might not (3), probably not (4), definitely not (5)

1. Provide services to remote workers
2. Help clients develop the habit of exercising
3. Help clients improve activities of daily living
4. Help clients create an active work day
5. Help clients prioritize their health and fitness

Do you think your internship prepared you to address with physical activity consequences of the pandemic including:

Options: definitely yes (1), probably yes (2), might or might not (3), probably not (4), definitely not (5)

1. Sedentary behavior
2. Social isolation
3. Stress
4. Mental wellness

How helpful did you find your masters student supervisor?

Options: Far above average (1), somewhat above average (2), average (3), somewhat below average (4), far below average (5)

How much input and feedback did your MS supervisor provide for your programming?

Options: a great deal (1), a lot (2), a moderate amount (3), a little (4), none at all (5)

Do you feel that they provided you learning opportunities with their comments and feedback?

Options: definitely yes (1), probably yes (2), might or might not (3), probably not (4), definitely not (5)

Thank you for completing this survey.
