# Supplementary material for: Evaluating 5% Healthier: An e-Service-Learning Teleexercise Program for Undergraduate and Graduate Students in Exercise Physiology
Source: Hindawi journal article supplement (doi:10.1155/2022/2889945), 2022-04-19
Supplement: f1 [file 2889945.f1.zip › Appendix 3 Grad Post Survey.docx]

Graduate Student Post Semester Survey

This anonymous survey is intended to capture your experience as a supervisor for 5% Healthier undergraduate student interns. It will not impact whether or not you pass this course. The information collected will be used to improve the course and student experiences.  Thank you for completing this survey.

Did your **experience as a supervisor for 5% Healthier undergraduate student interns** prepare you for working in a remote or hybrid employment position after graduation?

Options: yes, no

This role has improved my ability to:

Options: definitely yes (1), probably yes (2), might or might not (3), probably not (4), definitely not (5)

1. Translate scientific information to a lay audience
2. Interact professionally with clients/patients
3. Develop exercise programming and prescription
4. Provide important and meaningful service to others
5. Develop professional competencies
6. Provide services to remote workers

Compared with when you started this supervisor role, how much have you improved in:

Options: a great deal (1), a lot (2), a moderate amount (3), a little (4), same as before (5)

1. Active listening skills
2. Providing constructive feedback
3. Taking the initiative
4. Self-confidence
5. Accepting constructive criticism
6. Leadership abilities
7. Quality of work produced
8. Ability to convey topics effectively
9. Timeliness of communication
10. Appropriateness and courtesy of communication
11. Verbal communication with clients/patients
12. Verbal communication with supervisors
13. Written communication with clients/patients
14. Written communication with supervisors
15. Teach based communication
16. Communication within a group or team

Serving as a supervisor has improved my ability to:

Options: definitely yes (1), probably yes (2), might or might not (3), probably not (4), definitely not (5)

1. Help mentees develop a greater understanding of exercise programming
2. Employ strategies to enhance mentees knowledge and abilities
3. Recognized and take advantage of teaching moments
4. Develop professional competencies

Thank you for completing this survey.
